# Supplementary material for: A paradigm for systematic screening and evaluation of artificial solid-electrolyte interfaces for lithium metal anodes: a computational study of binary selenides
Source: Royal Society of Chemistry journal article supplement (doi:10.1039/d2ta07011a), 2022-01-01
Supplement: d2ta07011a1.pdf [file d2ta07011a1.pdf]

# Supplementary Material

## A Paradigm for Systematic Screening and Evaluation of Artificial Solid-Electrolyte Interfaces for Lithium Metal Anodes: A Computational Study of Binary Selenides

Wenshan Xiao<sup>a</sup>, Mingwei Wu<sup>a</sup>, Huan Wang<sup>a</sup>, Qiu He<sup>a,c</sup>\*, Yan Zhao<sup>a,b,c</sup>\*

<sup>a</sup> *International School of Materials Science and Engineering, State Key Laboratory of Advanced Technology for Materials Synthesis and Processing, Wuhan University of Technology, Hubei 430070, China.*

<sup>b</sup> *The Institute of Technological Sciences, Wuhan University, Hubei, Wuhan 430072, China.*

<sup>c</sup> *College of Materials Science and Engineering, Sichuan University, Chengdu 610065, China*

\* Corresponding author. E-mail address: [hq5220@whut.edu.cn](mailto:hq5220@whut.edu.cn) (Q. H.)

[yan2000@whut.edu.cn](mailto:yan2000@whut.edu.cn) (Y. Z.)

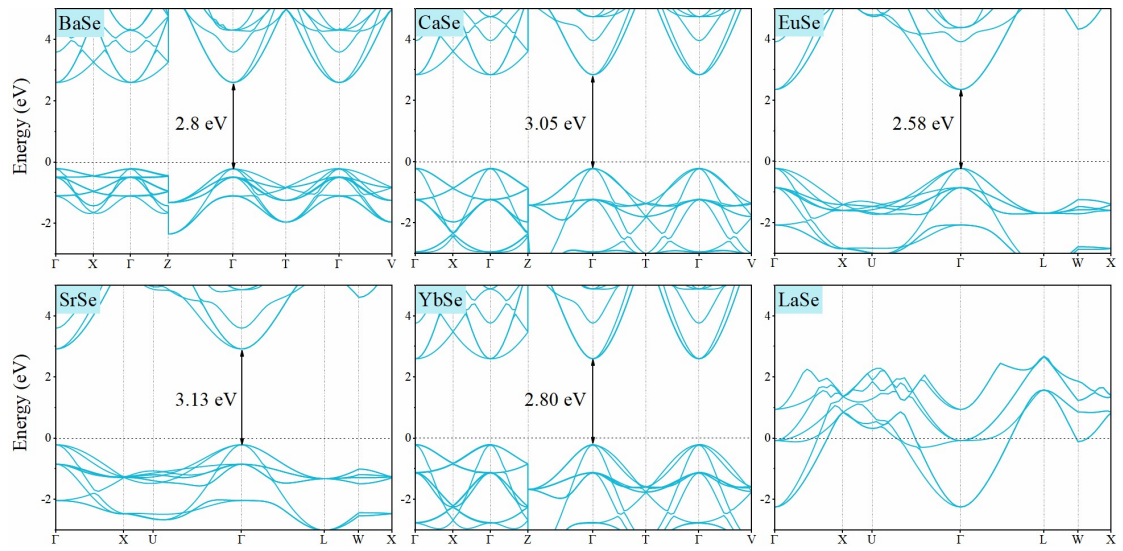

**Fig. S1.** Band structures of six lithium-stable selenides.

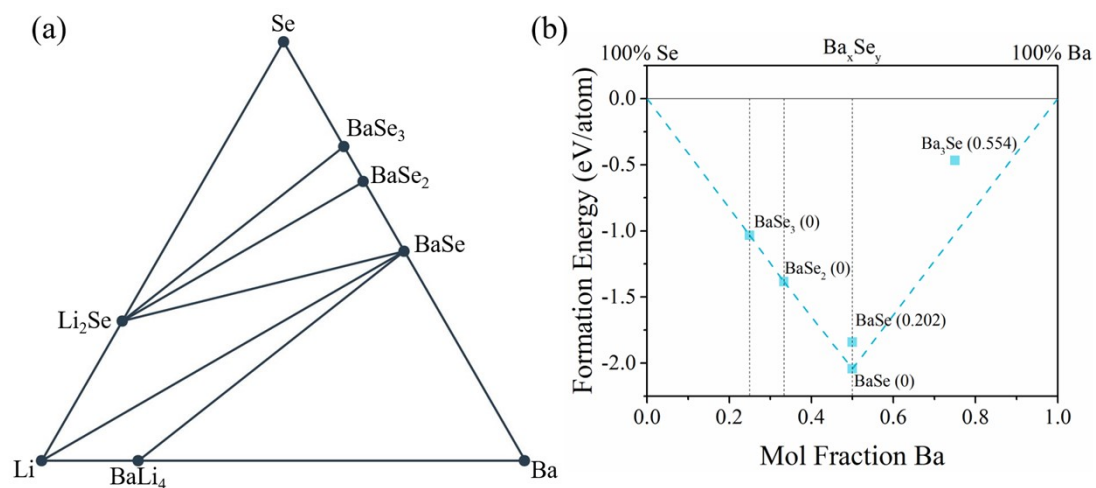

**Fig. S2.** (a) Phase diagram of Li-Ba-Se. (b) Convex hull diagram of  $\text{Ba}_x\text{Se}_y$  with energies of five Ba-Se phases above the convex hull marked.

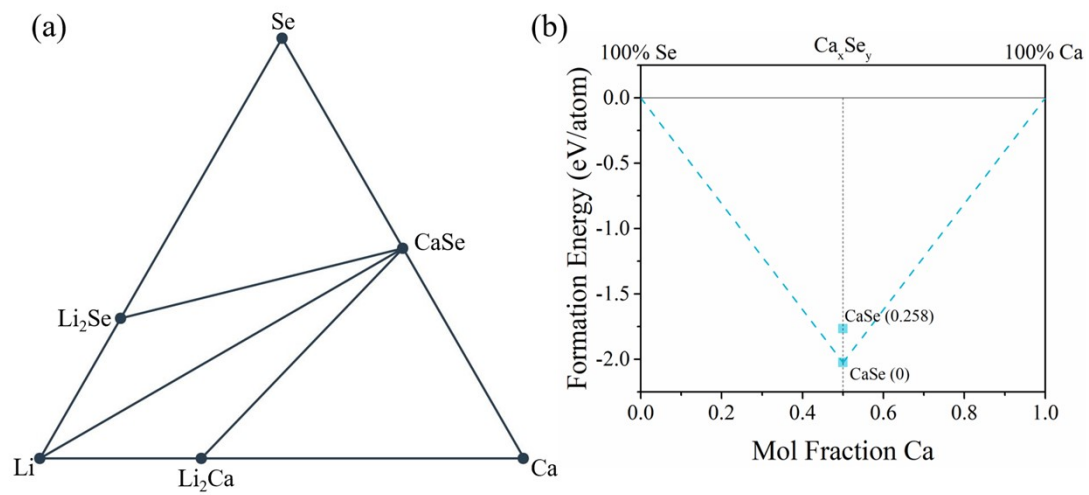

**Fig. S3.** (a) Phase diagram of Li-Ca-Se. (b) Convex hull diagram of  $\text{Ca}_x\text{Se}_y$  with energies of two Ca-Se phases above the convex hull marked.

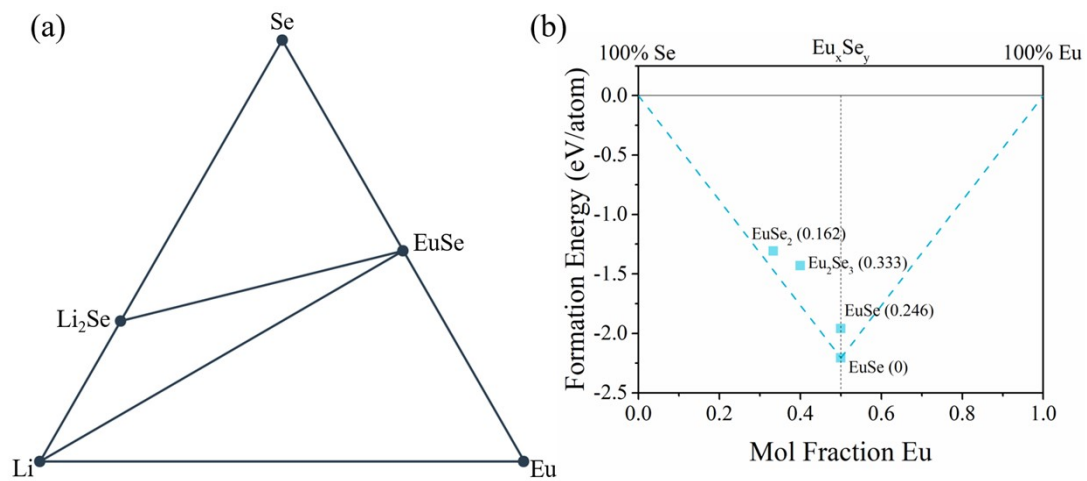

**Fig. S4.** (a) Phase diagram of Li-Eu-Se. (b) Convex hull diagram of  $\text{Eu}_x\text{Se}_y$  with energies of four Eu-Se phases above the convex hull marked.

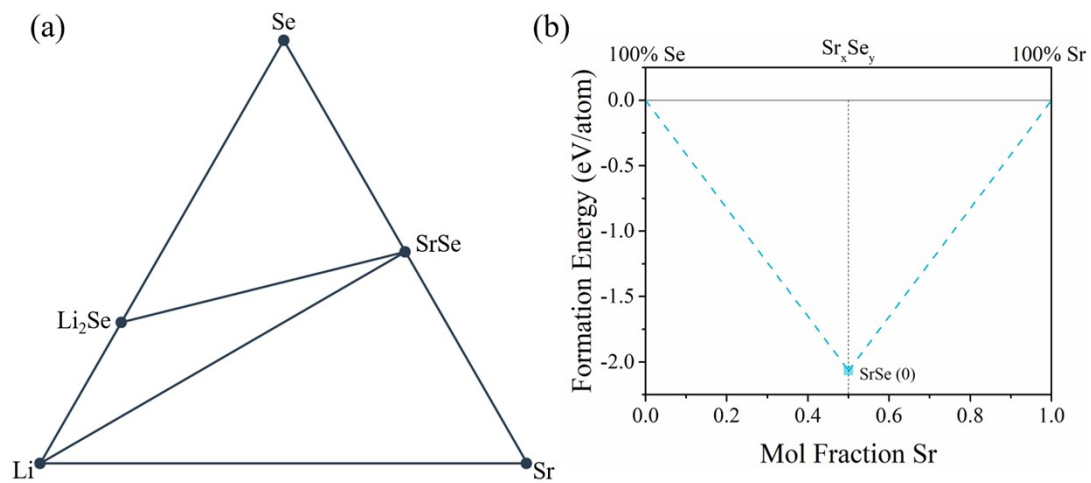

**Fig. S5.** (a) Phase diagram of Li-Sr-Se. (b) Convex hull diagram of Sr<sub>x</sub>Se<sub>y</sub> with the energy of SrSe above the convex hull marked.

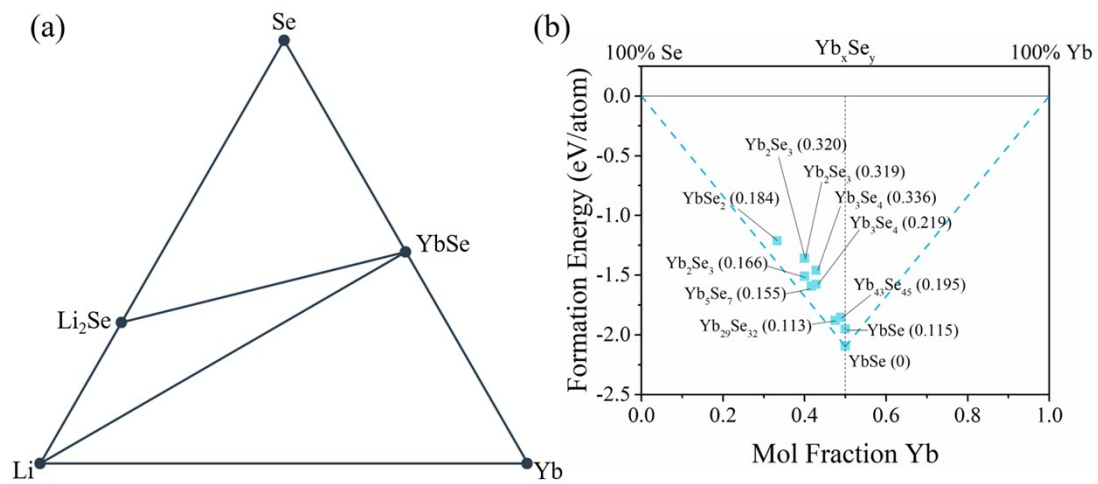

**Fig. S6.** (a) Phase diagram of Li-Yb-Se. (b) Convex hull diagram of Yb<sub>x</sub>Se<sub>y</sub> with energies of eleven Yb-Se phases above the convex hull marked.

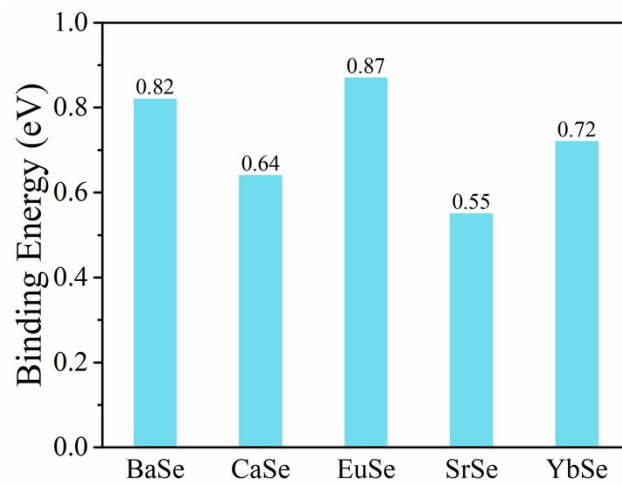

**Fig. S7.** Binding energies between the Li atom and selenides at site 2.



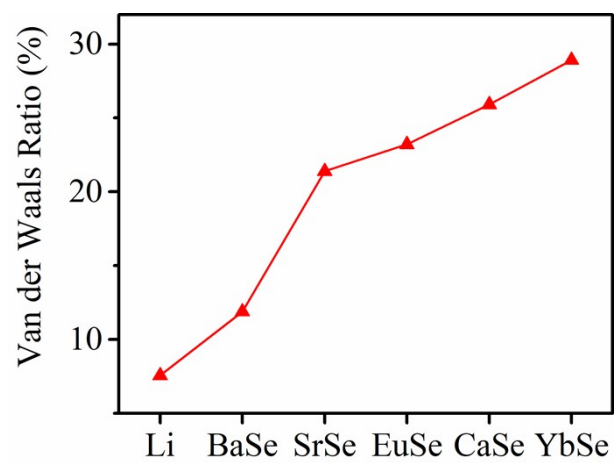

**Fig. S8.** Ratios of vdW interaction of Li ion with lithium metal/selenides.

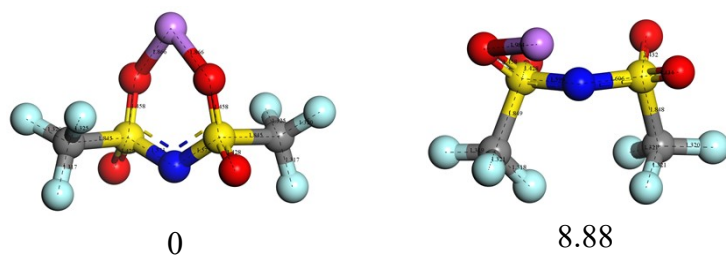

**Fig. S9.** Isomers of LiTFSI. The relative energy (kcal/mol) is shown below each isomer.

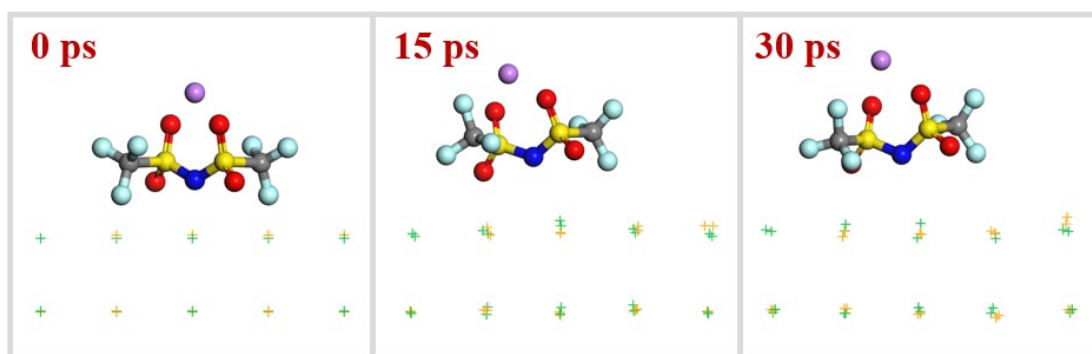

**Fig. S10.** Sequence of LiTFSI behavior on YbSe surface in DOL/DME mixture obtained from AIMD simulation (LiTFSI is not decomposed).

**Table S1.** The cathodic limits, lithiation products, and reaction energy  $E_D$  of binary selenides.

| Compound                        | Phase equilibria at cathodic limit                                                   | Cathodic limit ref. to Li/Li <sup>+</sup> (V) | Phase equilibria with Li metal                        | $E_D$ per Li (eV) |
|---------------------------------|--------------------------------------------------------------------------------------|-----------------------------------------------|-------------------------------------------------------|-------------------|
| BeSe                            | Be, Li <sub>2</sub> Se                                                               | 1.098                                         | Be, Li <sub>2</sub> Se                                | -1.098            |
| BSe <sub>2</sub>                | B, Li <sub>2</sub> B <sub>2</sub> Se <sub>5</sub>                                    | 1.800                                         | LiB, Li <sub>2</sub> B <sub>2</sub> Se <sub>5</sub>   | -1.509            |
| CSe <sub>2</sub>                | C, Li <sub>2</sub> Se                                                                | 2.395                                         | LiCl <sub>2</sub> , Li <sub>2</sub> Se                | -2.347            |
| Na <sub>2</sub> Se              | Na, NaLiSe                                                                           | 0.315                                         | Na, Li <sub>2</sub> Se                                | -0.288            |
| MgSe                            | LiMg <sub>149</sub> , Li <sub>2</sub> Se                                             | 0.649                                         | Li <sub>5</sub> Mg, Li <sub>2</sub> Se                | -0.201            |
| Al <sub>2</sub> Se <sub>3</sub> | Al, LiAlSe <sub>2</sub>                                                              | 1.557                                         | Li <sub>2</sub> Al, Li <sub>2</sub> Se                | -0.812            |
| SiSe <sub>2</sub>               | Si, Li <sub>2</sub> Se                                                               | 1.553                                         | Li <sub>21</sub> Si <sub>5</sub> , Li <sub>2</sub> Se | -0.893            |
| P <sub>2</sub> Se <sub>5</sub>  | PSe, Li <sub>7</sub> PSe <sub>6</sub>                                                | 1.954                                         | Li <sub>3</sub> P, Li <sub>2</sub> Se                 | -1.526            |
| K <sub>2</sub> Se               | K, KLiSe                                                                             | 0.350                                         | K, Li <sub>2</sub> Se                                 | -0.246            |
| CaSe                            | Li <sub>2</sub> Ca, Li <sub>2</sub> Se                                               | -0.057                                        | Li <sub>2</sub> Ca, Li <sub>2</sub> Se                | 0.057             |
| Sc <sub>2</sub> Se <sub>3</sub> | ScSe, Li <sub>2</sub> Se                                                             | 0.803                                         | Sc, Li <sub>2</sub> Se                                | -0.469            |
| TiSe <sub>2</sub>               | Li(TiSe <sub>2</sub> ) <sub>3</sub>                                                  | 1.575                                         | Ti, Li <sub>2</sub> Se                                | -1.057            |
| V <sub>2</sub> Se <sub>9</sub>  | VSe <sub>2</sub> , Li <sub>2</sub> Se                                                | 1.855                                         | V, Li <sub>2</sub> Se                                 | -1.640            |
| CrSe <sub>2</sub>               | Cr <sub>5</sub> Se <sub>8</sub> , Li <sub>2</sub> Se                                 | 1.885                                         | Cr, Li <sub>2</sub> Se                                | -1.550            |
| MnSe <sub>2</sub>               | LiMn <sub>9</sub> Se <sub>10</sub> , Li <sub>2</sub> Se                              | 1.821                                         | Mn, Li <sub>2</sub> Se                                | -0.952            |
| FeSe <sub>2</sub>               | FeSe, Li <sub>2</sub> Se                                                             | 1.630                                         | Fe, Li <sub>2</sub> Se                                | -1.625            |
| CoSe <sub>2</sub>               | Co <sub>3</sub> Se <sub>4</sub> , Li <sub>2</sub> Se                                 | 1.726                                         | Co, Li <sub>2</sub> Se                                | -1.668            |
| NiSe <sub>2</sub>               | Ni <sub>3</sub> Se <sub>4</sub> , Li <sub>2</sub> Se                                 | 1.888                                         | Ni, Li <sub>2</sub> Se                                | -1.711            |
| CuSe                            | Cu <sub>3</sub> Se <sub>2</sub> , Li <sub>2</sub> Se                                 | 1.854                                         | LiCu <sub>3</sub> , Li <sub>2</sub> Se                | -1.535            |
| ZnSe                            | Zn, Li <sub>2</sub> Se                                                               | 1.175                                         | LiZn, Li <sub>2</sub> Se                              | -0.929            |
| Ga <sub>2</sub> Se <sub>3</sub> | GaSe, LiGaSe <sub>2</sub>                                                            | 1.900                                         | Li <sub>2</sub> Ga, Li <sub>2</sub> Se                | -1.021            |
| GeSe <sub>2</sub>               | GeSe, Li <sub>2</sub> Se                                                             | 1.720                                         | Li <sub>15</sub> Ge <sub>4</sub> , Li <sub>2</sub> Se | -1.077            |
| As <sub>2</sub> Se <sub>3</sub> | As, LiAsSe <sub>2</sub>                                                              | 1.821                                         | Li <sub>3</sub> As, Li <sub>2</sub> Se                | -1.371            |
| RbSe                            | RbLiSe, Li <sub>2</sub> Se                                                           | 1.684                                         | Rb, Li <sub>2</sub> Se                                | -0.963            |
| SrSe                            | Sr, Li <sub>2</sub> Se                                                               | -0.172                                        | Sr, Li <sub>2</sub> Se                                | 0.172             |
| Y <sub>2</sub> Se <sub>3</sub>  | YSe, LiYSe <sub>2</sub>                                                              | 0.845                                         | Y, Li <sub>2</sub> Se                                 | -0.311            |
| ZrSe <sub>2</sub>               | LiZrSe <sub>2</sub> , Li <sub>2</sub> Se                                             | 1.440                                         | Zr, Li <sub>2</sub> Se                                | -0.894            |
| Nb <sub>2</sub> Se <sub>9</sub> | NbSe <sub>2</sub> , Li <sub>2</sub> Se                                               | 1.833                                         | Nb, Li <sub>2</sub> Se                                | -1.578            |
| MoSe <sub>2</sub>               | Li <sub>7</sub> (Mo <sub>3</sub> Se <sub>4</sub> ) <sub>4</sub> , Li <sub>2</sub> Se | 1.389                                         | Mo, Li <sub>2</sub> Se                                | -1.386            |
| RuSe <sub>2</sub>               | Ru, Li <sub>2</sub> Se                                                               | 1.572                                         | Ru, Li <sub>2</sub> Se                                | -1.572            |
| RhSe <sub>2</sub>               | Rh <sub>2</sub> Se <sub>3</sub> , Li <sub>2</sub> Se                                 | 1.623                                         | LiRh, Li <sub>2</sub> Se                              | -1.331            |
| PdSe <sub>2</sub>               | PdSe, Li <sub>2</sub> Se                                                             | 1.793                                         | Li <sub>15</sub> Pd <sub>4</sub> , Li <sub>2</sub> Se | -1.032            |
| Ag <sub>2</sub> Se              | Ag, Li <sub>2</sub> Se                                                               | 1.790                                         | Li <sub>3</sub> Ag, Li <sub>2</sub> Se                | -0.605            |
| CdSe <sub>2</sub>               | CdSe, Li <sub>2</sub> Se                                                             | 2.011                                         | Li <sub>3</sub> Cd, Li <sub>2</sub> Se                | -1.041            |
| In <sub>2</sub> Se <sub>3</sub> | InSe, LiInSe <sub>2</sub>                                                            | 1.909                                         | Li <sub>13</sub> In <sub>3</sub> , Li <sub>2</sub> Se | -0.747            |
| SnSe <sub>2</sub>               | SnSe, Li <sub>2</sub> SnSe <sub>3</sub>                                              | 1.907                                         | Li <sub>17</sub> Sn <sub>4</sub> , Li <sub>2</sub> Se | -1.019            |
| Sb <sub>2</sub> Se <sub>3</sub> | Sb, LiSbSe <sub>2</sub>                                                              | 1.696                                         | Li <sub>3</sub> Sb, Li <sub>2</sub> Se                | -1.296            |
| TeSe <sub>2</sub>               | LiTe <sub>3</sub> , Li <sub>2</sub> Se                                               | 1.956                                         | Li <sub>2</sub> Te, Li <sub>2</sub> Se                | -1.847            |
| Cs <sub>2</sub> Se              | Cs, Li <sub>2</sub> Se                                                               | 0.319                                         | Cs, Li <sub>2</sub> Se                                | -0.319            |
| BaSe                            | BaLi <sub>4</sub> , Li <sub>2</sub> Se                                               | -0.052                                        | BaLi <sub>4</sub> , Li <sub>2</sub> Se                | 0.052             |

|                                                |                                                        |        |                                                       |        |
|------------------------------------------------|--------------------------------------------------------|--------|-------------------------------------------------------|--------|
| La <sub>2</sub> Se <sub>3</sub>                | LaSe, Li <sub>2</sub> Se                               | 0.804  | LaSe, Li <sub>2</sub> Se                              | -0.804 |
| LaSe                                           | La, Li <sub>2</sub> Se                                 | -0.104 | La, Li <sub>2</sub> Se                                | 0.104  |
| CeSe <sub>2</sub>                              | Ce <sub>10</sub> Se <sub>19</sub> , Li <sub>2</sub> Se | 1.886  | Ce, Li <sub>2</sub> Se                                | -0.689 |
| Pr <sub>2</sub> Se <sub>3</sub>                | Pr <sub>27</sub> Se <sub>40</sub> , Li <sub>2</sub> Se | 1.223  | Pr, Li <sub>2</sub> Se                                | -0.319 |
| Nd <sub>2</sub> Se <sub>3</sub>                | NdSe, Li <sub>2</sub> Se                               | 0.848  | Nd, Li <sub>2</sub> Se                                | -0.323 |
| Pm <sub>2</sub> Se <sub>3</sub>                | PmSe, Li <sub>2</sub> Se                               | 0.805  | Pm, Li <sub>2</sub> Se                                | -0.311 |
| Sm <sub>2</sub> Se <sub>3</sub>                | SmSe, LiSmSe <sub>2</sub>                              | 0.811  | Sm, Li <sub>2</sub> Se                                | -0.317 |
| EuSe <sub>2</sub>                              | EuSe, Li <sub>2</sub> Se                               | 1.896  | EuSe, Li <sub>2</sub> Se                              | -1.896 |
| EuSe                                           | Eu, Li <sub>2</sub> Se                                 | -0.135 | Eu, Li <sub>2</sub> Se                                | 0.135  |
| Gd <sub>2</sub> Se <sub>3</sub>                | GdSe, LiGdSe <sub>2</sub>                              | 1.032  | Gd, Li <sub>2</sub> Se                                | -0.313 |
| Tb <sub>2</sub> Se <sub>3</sub>                | TbSe, LiTbSe <sub>2</sub>                              | 0.937  | Tb, Li <sub>2</sub> Se                                | -0.331 |
| Dy <sub>2</sub> Se <sub>3</sub>                | DySe, LiDySe <sub>2</sub>                              | 0.962  | Dy, Li <sub>2</sub> Se                                | -0.341 |
| Ho <sub>2</sub> Se <sub>3</sub>                | HoSe, LiHoSe <sub>2</sub>                              | 0.811  | Ho, Li <sub>2</sub> Se                                | -0.325 |
| Er <sub>2</sub> Se <sub>3</sub>                | ErSe, LiErSe <sub>2</sub>                              | 0.772  | Er, Li <sub>2</sub> Se                                | -0.329 |
| Tm <sub>2</sub> Se <sub>3</sub>                | TmSe, Li <sub>2</sub> Se                               | 0.528  | Tm, Li <sub>2</sub> Se                                | -0.335 |
| YbSe <sub>2</sub>                              | YbSe, Li <sub>2</sub> Se                               | 2.167  | YbSe, Li <sub>2</sub> Se                              | -2.167 |
| YbSe                                           | Yb, Li <sub>2</sub> Se                                 | -0.195 | Yb, Li <sub>2</sub> Se                                | 0.195  |
| Lu <sub>2</sub> Se <sub>3</sub>                | LuSe, Li <sub>2</sub> Se                               | 0.438  | Lu, Li <sub>2</sub> Se                                | -0.350 |
| HfSe <sub>2</sub>                              | LiHfSe <sub>2</sub> , Li <sub>2</sub> Se               | 1.150  | Hf, Li <sub>2</sub> Se                                | -0.882 |
| TaSe <sub>3</sub>                              | TaSe <sub>2</sub> , Li <sub>2</sub> Se                 | 1.812  | Ta, Li <sub>2</sub> Se                                | -1.455 |
| WSe <sub>2</sub>                               | W, Li <sub>2</sub> Se                                  | 1.473  | W, Li <sub>2</sub> Se                                 | -1.473 |
| ReSe <sub>2</sub>                              | Re, Li <sub>2</sub> Se                                 | 1.591  | Re, Li <sub>2</sub> Se                                | -1.591 |
| OsSe <sub>2</sub>                              | Os, Li <sub>2</sub> Se                                 | 1.758  | Os, Li <sub>2</sub> Se                                | -1.758 |
| IrSe <sub>2</sub>                              | Ir, Li <sub>2</sub> Se                                 | 1.634  | LiIr, Li <sub>2</sub> Se                              | -1.414 |
| PtSe <sub>2</sub>                              | Pt <sub>5</sub> Se <sub>4</sub> , Li <sub>2</sub> Se   | 1.633  | Li <sub>3</sub> Pt, Li <sub>2</sub> Se                | -1.153 |
| AuSe                                           | Au, Li <sub>2</sub> Se                                 | 1.790  | Li <sub>15</sub> Au <sub>4</sub> , Li <sub>2</sub> Se | -0.914 |
| HgSe                                           | Hg, Li <sub>2</sub> Se                                 | 1.685  | Li <sub>3</sub> Hg, Li <sub>2</sub> Se                | -0.898 |
| Tl <sub>2</sub> Se <sub>3</sub>                | TlSe, Li <sub>2</sub> Se                               | 1.921  | Li <sub>3</sub> Tl, Li <sub>2</sub> Se                | -1.012 |
| PbSe <sub>2</sub>                              | PbSe, Li <sub>2</sub> Se                               | 1.972  | Li <sub>17</sub> Pb <sub>4</sub> , Li <sub>2</sub> Se | -0.985 |
| BiSe <sub>2</sub>                              | Bi <sub>2</sub> Se <sub>3</sub> , Li <sub>2</sub> Se   | 2.014  | Li <sub>3</sub> Bi, Li <sub>2</sub> Se                | -1.263 |
| AcSe <sub>3</sub>                              | Ac, Li <sub>2</sub> Se                                 | 1.193  | Ac, Li <sub>2</sub> Se                                | -1.193 |
| ThSe <sub>2</sub>                              | Th <sub>7</sub> Se <sub>12</sub> , Li <sub>2</sub> Se  | 1.092  | Th, Li <sub>2</sub> Se                                | -0.593 |
| PaSe <sub>3</sub>                              | Pa, Li <sub>2</sub> Se                                 | 1.322  | Pa, Li <sub>2</sub> Se                                | -1.322 |
| USe <sub>3</sub>                               | USe <sub>2</sub> , Li <sub>2</sub> Se                  | 1.732  | U, Li <sub>2</sub> Se                                 | -1.269 |
| Np <sub>2</sub> Se <sub>5</sub>                | Np <sub>3</sub> Se <sub>5</sub> , Li <sub>2</sub> Se   | 1.732  | Np, Li <sub>2</sub> Se                                | -1.209 |
| PuSe <sub>2</sub>                              | Pu <sub>2</sub> Se <sub>3</sub> , Li <sub>2</sub> Se   | 1.828  | Pu, Li <sub>2</sub> Se                                | -0.914 |
| Li <sub>2</sub> B <sub>2</sub> Se <sub>5</sub> | B, Li <sub>2</sub> Se                                  | 1.788  | LiB, Li <sub>2</sub> Se                               | -1.500 |
| Li <sub>8</sub> SeN <sub>2</sub>               | Li <sub>3</sub> N, Li <sub>2</sub> Se                  | -0.009 | Li <sub>3</sub> N, Li <sub>2</sub> Se                 | 0.009  |
| NaLiSe                                         | Na, Li <sub>2</sub> Se                                 | 0.281  | Na, Li <sub>2</sub> Se                                | -0.281 |
| LiAlSe <sub>2</sub>                            | Al, Li <sub>2</sub> Se                                 | 1.069  | Li <sub>2</sub> Al, Li <sub>2</sub> Se                | -0.739 |
| Li <sub>7</sub> PSe <sub>6</sub>               | P, Li <sub>2</sub> Se                                  | 1.851  | Li <sub>3</sub> P, Li <sub>2</sub> Se                 | -1.505 |
| KLiSe                                          | K, Li <sub>2</sub> Se                                  | 0.141  | K, Li <sub>2</sub> Se                                 | -0.141 |
| Li(TiSe <sub>2</sub> ) <sub>3</sub>            | LiTiSe <sub>2</sub> , Li <sub>2</sub> Se               | 1.557  | Ti, Li <sub>2</sub> Se                                | -1.010 |
| LiTiSe <sub>2</sub>                            | Ti <sub>3</sub> Se <sub>4</sub> , Li <sub>2</sub> Se   | 1.365  | Ti, Li <sub>2</sub> Se                                | -1.365 |

|                                                                 |                                        |       |                                                       |        |
|-----------------------------------------------------------------|----------------------------------------|-------|-------------------------------------------------------|--------|
| LiMn <sub>9</sub> Se <sub>10</sub>                              | Mn, Li <sub>2</sub> Se                 | 1.528 | Mn, Li <sub>2</sub> Se                                | -1.528 |
| LiGaSe <sub>2</sub>                                             | GaSe, Li <sub>2</sub> Se               | 1.322 | Li <sub>2</sub> Ga, Li <sub>2</sub> Se                | -0.964 |
| LiAsSe <sub>2</sub>                                             | As, Li <sub>2</sub> Se                 | 1.783 | Li <sub>3</sub> As, Li <sub>2</sub> Se                | -1.366 |
| RbLiSe                                                          | Rb, Li <sub>2</sub> Se                 | 0.241 | Rb, Li <sub>2</sub> Se                                | -0.241 |
| LiYSe <sub>2</sub>                                              | YSe, Li <sub>2</sub> Se                | 0.498 | Y, Li <sub>2</sub> Se                                 | -0.253 |
| LiZrSe <sub>2</sub>                                             | ZrSe, Li <sub>2</sub> Se               | 1.048 | Zr, Li <sub>2</sub> Se                                | -0.712 |
| LiNbSe <sub>2</sub>                                             | Nb, Li <sub>2</sub> Se                 | 1.089 | Nb, Li <sub>2</sub> Se                                | -1.089 |
| Li <sub>7</sub> (Mo <sub>3</sub> Se <sub>4</sub> ) <sub>4</sub> | Mo, Li <sub>2</sub> Se                 | 1.383 | Mo, Li <sub>2</sub> Se                                | -1.383 |
| LiInSe <sub>2</sub>                                             | In, Li <sub>2</sub> Se                 | 1.360 | Li <sub>13</sub> In <sub>3</sub> , Li <sub>2</sub> Se | -0.706 |
| Li <sub>2</sub> SnSe <sub>3</sub>                               | SnSe, Li <sub>2</sub> Se               | 1.723 | Li <sub>17</sub> Sn <sub>4</sub> , Li <sub>2</sub> Se | -0.997 |
| LiSbSe <sub>2</sub>                                             | Sb, Li <sub>2</sub> Se                 | 1.672 | Li <sub>3</sub> Sb, Li <sub>2</sub> Se                | -1.293 |
| LiSmSe <sub>2</sub>                                             | SmSe, Li <sub>2</sub> Se               | 0.767 | Sm, Li <sub>2</sub> Se                                | -0.310 |
| LiTbSe <sub>2</sub>                                             | TbSe, Li <sub>2</sub> Se               | 0.537 | Tb, Li <sub>2</sub> Se                                | -0.264 |
| LiDySe <sub>2</sub>                                             | DySe, Li <sub>2</sub> Se               | 0.492 | Dy, Li <sub>2</sub> Se                                | -0.263 |
| LiHoSe <sub>2</sub>                                             | HoSe, Li <sub>2</sub> Se               | 0.439 | Ho, Li <sub>2</sub> Se                                | -0.263 |
| LiErSe <sub>2</sub>                                             | ErSe, Li <sub>2</sub> Se               | 0.385 | Er, Li <sub>2</sub> Se                                | -0.264 |
| LiHfSe <sub>2</sub>                                             | Hf <sub>2</sub> Se, Li <sub>2</sub> Se | 0.849 | Hf, Li <sub>2</sub> Se                                | -0.792 |

**Table S2.** Bond angle and bond length changes near the adsorption site of five selenides before and after adsorption of Li<sup>+</sup>.

| Species |        | Length 1 | Length 2 | Length 3 | Length 4 | $\Delta$ Length | Angle  | $\Delta$ Angle |
|---------|--------|----------|----------|----------|----------|-----------------|--------|----------------|
| BaSe    | Before | 3.343    | 3.343    | 3.344    | 3.344    | 0.074           | 90.018 | 0.234          |
|         | After  | 3.43     | 3.418    | 3.405    | 3.416    |                 | 89.784 |                |
| CaSe    | Before | 2.985    | 2.985    | 2.985    | 2.985    | 0.061           | 89.889 | 0.041          |
|         | After  | 3.045    | 3.047    | 3.046    | 3.044    |                 | 89.848 |                |
| EuSe    | Before | 3.06     | 3.06     | 3.06     | 3.06     | 0.067           | 89.952 | 0.089          |
|         | After  | 3.127    | 3.124    | 3.126    | 3.129    |                 | 89.863 |                |
| SrSe    | Before | 3.152    | 3.152    | 3.152    | 3.152    | 0.060           | 89.95  | 0.047          |
|         | After  | 3.212    | 3.207    | 3.212    | 3.216    |                 | 89.997 |                |
| YbSe    | Before | 2.956    | 2.956    | 2.956    | 2.956    | 0.058           | 89.886 | 0.025          |
|         | After  | 3.016    | 3.011    | 3.011    | 3.017    |                 | 89.861 |                |
